# Supplementary material for: Eukaryotic-Like Virus Budding in Archaea
Source: PubMed Central journal article supplement (PMC5021807; doi:10.1128/mbio.01439-16), 2016-09-13

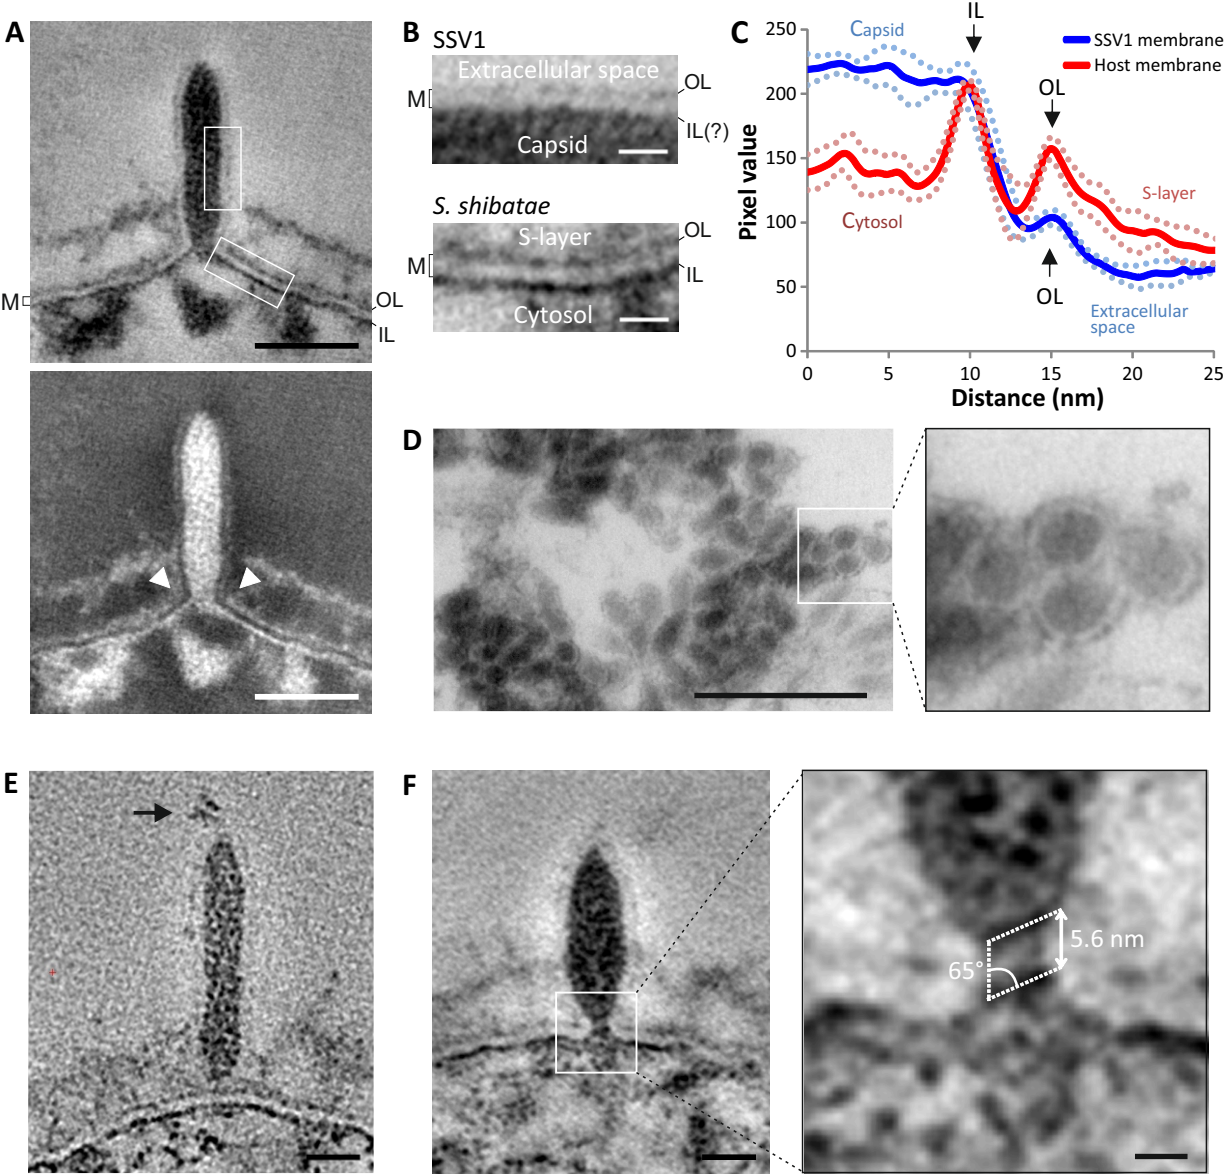

Supplement: mbo004162977sf2.pdf [file mbo004162977sf2.pdf]
